# Supplementary material
Source: PubMed Central journal article supplement (PMC10719741)
Supplement: EIJ-D-23-00432_Albaghdadi_SD.pdf [file EIJ-D-23-00432_Albaghdadi_SD.pdf]

Supplementary data

**Supplementary Table 1. International Classification of Diseases (ICD) codes used for out-of-hospital Medicare-linked endpoints.**

|                                              | <b>ICD-10-PCS Code</b>                                                                                                                                                                                                                                                                                                                                                                                                                                                                                                                                                                                                                                                                                                                                                                                                                                                                                            | <b>ICD-9-PCS Codes</b>                          |
|----------------------------------------------|-------------------------------------------------------------------------------------------------------------------------------------------------------------------------------------------------------------------------------------------------------------------------------------------------------------------------------------------------------------------------------------------------------------------------------------------------------------------------------------------------------------------------------------------------------------------------------------------------------------------------------------------------------------------------------------------------------------------------------------------------------------------------------------------------------------------------------------------------------------------------------------------------------------------|-------------------------------------------------|
| <b>Repeat Endovascular Revascularization</b> | 047K3Z1, 047M3Z1, 047L3Z1, 047N3Z1, 047K341, 047M341, 047L341, 047N341, 047K3D1, 047M3D1, 047L3D1, 047N3D1, 047K3Z6, 047K3ZZ, 047M3Z6, 047M3ZZ, 047L3ZZ, 047L3Z6, 047N3Z6, 047N3ZZ, 047K346, 047K34Z, 047K356, 047K35Z, 047K366, 047K36Z, 047K376, 047K37Z, 047M346, 047M34Z, 047M356, 047M35Z, 047M366, 047M36Z, 047M376, 047M37Z, 047L346, 047L34Z, 047L356, 047L35Z, 047L366, 047L36Z, 047L376, 047L37Z, 047N346, 047N34Z, 047N356, 047N35Z, 047N366, 047N36Z, 047N376, 047N37Z, 047K3D6, 047K3DZ, 047K3E6, 047K3EZ, 047K3F6, 047K3FZ, 047K3G6, 047K3GZ, 047M3D6, 047M3DZ, 047M3E6, 047M3EZ, 047M3F6, 047M3FZ, 047M3G6, 047M3GZ, 047L3D6, 047L3DZ, 047L3E6, 047L3EZ, 047L3F6, 047L3FZ, 047L3G6, 047L3GZ, 047N3D6, 047N3DZ, 047N3E6, 047N3EZ, 047N3F6, 047N3FZ, 047N3G6, 047N3GZ                                                                                                                                | 39.50, 39.90, 00.55, 00.60                      |
| <b>Surgical Revascularization</b>            | 041K09H, 041K09J, 041K09K, 041K09L, 041K09M, 041K09N, 041K09P, 041K09Q, 041K09S, 041K0AH, 041K0AJ, 041K0AL, 041K0AL, 041K0AM, 041K0AN, 041K0AP, 041K0AQ, 041K0AS, 041K0JH, 041K0JJ, 041K0JK, 041K0JL, 041K0JM, 041K0JN, 041K0JP, 041K0JQ, 041K0JS, 041K0KH, 041K0KJ, 041K0KK, 041K0KL, 041K0KM, 041K0KN, 041K0KP, 041K0KQ, 041K0KS, 041K0ZH, 041K0ZJ, 041K0ZK, 041K0ZL, 041K0ZM, 041K0ZN, 041K0ZP, 041K0ZQ, 041K0ZS, 041K3JQ, 041K3JS, 041K49H, 041K49J, 041K49K, 041K49L, 041K49M, 041K49N, 041K49P, 041K49Q, 041K49S, 041K4AH, 041K4AJ, 041K4AK, 041K4AL, 041K4AM, 041K4AN, 041K4AP, 041K4AQ, 041K4AS, 041K4JH, 041K4JJ, 041K4JK, 041K4JL, 041K4JM, 041K4JN, 041K4JP, 041K4JQ, 041K4JS, 041K4KH, 041K4KJ, 041K4KK, 041K4KL, 041K4KM, 041K4KN, 041K4KP, 041K4KQ, 041K4KS, 041K4ZH, 041K4ZJ, 041K4ZK, 041K4ZL, 041K4ZM, 041K4ZN, 041K4ZP, 041K4ZQ, 041K4ZS, 041L09H, 041L09J, 041L09K, 041L09L, 041L09M, 041L09N, | 38.08, 38.16, 38.18, 38.38, 38.48, 38.68, 38.88 |

041L09P, 041L09Q, 041L09S, 041L0AH, 041L0AJ,  
041L0AL, 041L0AL, 041L0AM, 041L0AN,  
041L0AP, 041L0AQ, 041L0AS, 041K0JH,  
041L0JJ, 041L0JK, 041L0JL, 041L0JM, 041L0JN,  
041L0JP, 041L0JQ, 041L0JS, 041L0KH, 041L0KJ,  
041L0KK, 041L0KL, 041L0KM, 041L0KN,  
041L0KP, 041L0KQ, 041L0KS, 041L0ZH,  
041L0ZJ, 041L0ZK, 041L0ZL, 041L0ZM,  
041L0ZN, 041L0ZP, 041L0ZQ, 041L0ZS,  
041L3JQ, 041L3JS,  
041L49H, 041L49J, 041L49K, 041L49L, 041L49M,  
041L49N, 041L49P, 041K49Q, 041L49S,  
041L4AH, 041L4AJ, 041L4AK, 041L4AL,  
041L4AM, 041L4AN, 041L4AP, 041L4AQ,  
041L4AS, 041L4JH, 041L4JJ, 041L4JK, 041L4JL,  
041L4JM, 041L4JN, 041L4JP, 041L4JQ, 041L4JS,  
041L4KH, 041L4KJ, 041L4KK, 041L4KL,  
041L4KM, 041L4KN, 041L4KP, 041L4KQ,  
041L4KS, 041L4ZH, 041L4ZJ, 041L4ZK,  
041L4ZL, 041L4ZM, 041L4ZN, 041L4ZP,  
041L4ZQ, 041L4ZS, 041M09L, 041M09M,  
041M09P, 041M09Q, 041M09S, 041M0AL,  
041M0AM, 041M0AP, 041M0AQ, 041M0AS,  
041M0JL, 041M0JM, 041M0JP, 041M0JQ,  
041M0JS, 041M0KL, 041M0KM, 041M0KP,  
041M0KQ, 041M0KS, 041M0ZL, 041M0ZM,  
041M0ZP, 041M0ZQ, 041M0ZS, 041M3JQ,  
041M3JS, 041M49L, 041M49M, 041M49P,  
041M49Q, 041M49S, 041M4AL, 041M4AM,  
041M4AP, 041M4AQ, 041M4AS, 041M4JL,  
041M4JM, 041M4JP, 041M4JQ, 041M4JS,  
041M4KL, 041M4KM, 041M4KP, 041M4KQ,  
041M4KS, 041M4ZL, 041M4ZM, 041M4ZP,  
041M4ZQ, 041M4ZS  
041N09L, 041N09M, 041N09P, 041N09Q,  
041N09S, 041N0AL, 041N0AM, 041N0AP,  
041N0AQ, 041N0AS, 041N0JL, 041N0JM,  
041N0JP, 041N0JQ, 041N0JS, 041N0KL,  
041N0KM, 041N0KP, 041N0KQ, 041N0KS,  
041N0ZL, 041N0ZM, 041N0ZP, 041N0ZQ,  
041N0ZS, 041N3JQ, 041N3JS, 041N49L,  
041N49M, 041N49P, 041N49Q, 041N49S,  
041N4AL, 041N4AM, 041N4AP, 041N4AQ,  
041N4AS, 041N4JL, 041N4JM, 041N4JP,  
041N4JQ, 041N4JS, 041N4KL, 041N4KM,  
041N4KP, 041N4KQ, 041N4KS, 041N4ZL,  
041N4ZM, 041N4ZP, 041N4ZQ,  
041N4ZS, 041009H, 041009K, 041009Q, 041009R,  
04100AH, 04100AK, 04100AQ, 04100AR,  
04100JH, 04100JK, 04100JQ, 04100JR, 04100KH,

04100KK, 04100KQ, 04100KR, 04100ZH,  
04100ZK, 04100ZQ, 04100ZR, 041049H, 041049K,  
041049Q, 041049R, 04104AH, 04104AK,  
04104AQ, 04104AR, 04104JH, 04104JK, 04104JQ,  
04104JR, 04104KH, 04104KK, 04104KQ,  
04104KR, 04104ZH, 04104ZK, 04104ZQ,  
04104ZR, 041C09H, 041C09J, 041C09K,  
041C09Q, 041C09R, 041C0AH, 041C0AJ,  
041C0AK, 041C0AQ, 041C0AR, 041C0JH,  
041C0JJ, 041C0JK, 041C0JQ, 041C0JR,  
041C0KH, 041C0KJ, 041C0KK, 041C0KQ,  
041C0KR, 041C0ZH, 041C0ZJ, 041C0ZK,  
041C0ZQ, 041C0ZR, 041C49H, 041C49J,  
041C49K, 041C49Q, 041C49R, 041C4AH,  
041C4AJ, 041C4AK, 041C4AQ, 041C4AR,  
041C4JH, 041C4JJ, 041C4JK, 041C4JQ, 041C4JR,  
041C4KH, 041C4KJ, 041C4KK, 041C4KQ,  
041C4KR, 041C4ZH, 041C4ZJ, 041C4ZK,  
041C4ZQ, 041C4ZR, 041D09K, 041D0AK,  
041D0JK, 041D0KK, 041D0ZK, 041D49K,  
041D4AK, 041D4JK, 041D4KK, 041D4ZK,  
041E09H, 041E09J, 041E09K, 041E09P, 041E09Q,  
041E0AH, 041E0AJ, 041E0AK, 041E0AP,  
041E0AQ, 041E0JH, 041E0JJ, 041E0JK, 041E0JP,  
041E0JQ, 041E0KH, 041E0KJ, 041E0KK,  
041E0KP, 041E0KQ, 041E0ZH, 041E0ZJ,  
041E0ZK, 041E0ZP, 041E0ZQ, 041E49H,  
041E49J, 041E49K, 041E49P, 041E49Q, 041E4AH,  
041E4AJ, 041E4AK, 041E4AP, 041E4AQ,  
041E4JH, 041E4JJ, 041E4JK, 041E4JP, 041E4JQ,  
041E4KH, 041E4KJ, 041E4KK, 041E4KP,  
041E4KQ, 041E4ZH, 041E4ZJ, 041E4ZK,  
041E4ZP, 041E4ZQ, 041F09K, 041F0AK,  
041F0JK, 041F0KK, 041F0ZK, 041F49K,  
041F4AK, 041F4JK, 041F4KK, 041F4ZK,  
041H09H, 041H09J, 041H09K, 041H09P,  
041H09Q, 041H0AH, 041H0AJ, 041H0AK,  
041H0AP, 041H0AQ, 041H0JH, 041H0JJ,  
041H0JK, 041H0JP, 041H0JQ, 041H0KH,  
041H0KJ, 041H0KK, 041H0KP, 041H0KQ,  
041H0ZH, 041H0ZJ, 041H0ZK, 041H0ZP,  
041H0ZQ, 041H49H, 041H49J, 041H49K,  
041H49P, 041H49Q, 041H4AH, 041H4AJ,  
041H4AK, 041H4AP, 041H4AQ, 041H4JH,  
041H4JJ, 041H4JK, 041H4JP, 041H4JQ,  
041H4KH, 041H4KJ, 041H4KK, 041H4KP,  
041H4KQ, 041H4ZH, 041H4ZJ, 041H4ZK,  
041H4ZP, 041H4ZQ, 041J09K, 041J0AK, 041J0JK,  
041J0KK, 041J0ZK, 041J49K, 041J4AK, 041J4JK,  
041J4KK, 041J4ZK, 041009J, 041009K, 041009Q,

041009R, 04100AJ, 04100AK, 04100AQ,  
04100AR, 04100JJ, 04100JK, 04100JQ, 04100JR,  
04100KJ, 04100KK, 04100KQ, 04100KR, 04100ZJ,  
04100ZK, 04100ZQ, 04100ZR, 041049J, 041049K,  
041049Q, 041049R, 04104AJ, 04104AK, 04104AQ,  
04104AR, 04104JJ, 04104JK, 04104JQ, 04104JR,  
04104KJ, 04104KK, 04104KQ, 04104KR, 04104ZJ,  
04104ZK, 04104ZQ, 04104ZR, 041C09K,  
041C0AK, 041C0JK, 041C0KK, 041C0ZK,  
041C49K, 041C4AK, 041C4JK, 041C4KK,  
041C4ZK, 041D09H, 041D09J, 041D09K,  
041D09Q, 041D09R, 041D0AH, 041D0AJ,  
041D0AK, 041D0AQ, 041D0AR, 041D0JH,  
041D0JJ, 041D0JK, 041D0JQ, 041D0JR,  
041D0KH, 041D0KJ, 041D0KK, 041D0KQ,  
041D0KR, 041D0ZH, 041D0ZJ, 041D0ZK,  
041D0ZQ, 041D0ZR, 041D49H, 041D49J,  
041D49K, 041D49Q, 041D49R, 041D4AH,  
041D4AJ, 041D4AK, 041D4AQ, 041D4AR,  
041D4JH, 041D4JJ, 041D4JK, 041D4JQ, 041D4JR,  
041D4KH, 041D4KJ, 041D4KK, 041D4KQ,  
041D4KR, 041D4ZH, 041D4ZJ, 041D4ZK,  
041D4ZQ, 041D4ZR, 041E09K, 041E0AK,  
041E0JK, 041E0KK, 041E0ZK, 041E49K,  
041E4AK, 041E4JK, 041E4KK, 041E4ZK,  
041F09H, 041F09J, 041F09K, 041F09P, 041F09Q,  
041F0AH, 041F0AJ, 041F0AK, 041F0AP,  
041F0AQ, 041F0JH, 041F0JJ, 041F0JK, 041F0JP,  
041F0JQ, 041F0KH, 041F0KJ, 041F0KK,  
041F0KP, 041F0KQ, 041F0ZH, 041F0ZJ,  
041F0ZK, 041F0ZP, 041F0ZQ, 041F49H, 041F49J,  
041F49K, 041F49P, 041F49Q, 041F4AH, 041F4AJ,  
041F4AK, 041F4AP, 041F4AQ, 041F4JH, 041F4JJ,  
041F4JK, 041F4JP, 041F4JQ, 041F4KH, 041F4KJ,  
041F4KK, 041F4KP, 041F4KQ, 041F4ZH,  
041F4ZJ, 041F4ZK, 041F4ZP, 041F4ZQ,  
041H09K, 041H0AK, 041H0JK, 041H0KK,  
041H0ZK, 041H49K, 041H4AK, 041H4JK,  
041H4KK, 041H4ZK, 041J09H, 041J09J, 041J09K,  
041J09P, 041J09Q, 041J0AH, 041J0AJ, 041J0AK,  
041J0AP, 041J0AQ, 041J0JH, 041J0JJ, 041J0JK,  
041J0JP, 041J0JQ, 041J0KH, 041J0KJ, 041J0KK,  
041J0KP, 041J0KQ, 041J0ZH, 041J0ZJ, 041J0ZK,  
041J0ZP, 041J0ZQ, 041J49H, 041J49J, 041J49K,  
041J49P, 041J49Q, 041J4AH, 041J4AJ, 041J4AK,  
041J4AP, 041J4AQ, 041J4JH, 041J4JJ, 041J4JK,  
041J4JP, 041J4JQ, 041J4KH, 041J4KJ, 041J4KK,  
041J4KP, 041J4KQ, 041J4ZH, 041J4ZJ, 041J4ZK,  
041J4ZP, 041J4ZQ

|                                          |                                                                                          |                                                 |
|------------------------------------------|------------------------------------------------------------------------------------------|-------------------------------------------------|
| <b>Amputation of Upper and Lower Leg</b> | 0Y6C0Zx, 0Y6D0Zx, 0Y6F0ZZ, 0Y6M0Z0, 0Y6N0Z0, 0Y6G0ZZ, 0Y6H0Zx, 0Y6J0Zx, 0Y670ZZ, 0Y680ZZ | 84.10, 84.12, 84.13, 84.14, 84.15, 84.16, 84.17 |
|------------------------------------------|------------------------------------------------------------------------------------------|-------------------------------------------------|
